# Supplementary material for: Efficient synthesis of 2,4,5-trisubstituted 2,5-chiral tetrahydropyridines using a one-pot asymmetric azaelectrocyclization protocol
Source: Royal Society of Chemistry journal article supplement (doi:10.1039/b900897g), 2009-01-01
Supplement: b900897g1.pdf [file b900897g1.pdf]

## X-ray Structure Report

March 2, 2009

## Experimental

### Data Collection

A colorless unknown crystal of  $C_{28}H_{33}NO_3$  having approximate dimensions of 0.68 x 0.46 x 0.27 mm was mounted on a glass fiber. All measurements were made on a Rigaku RAXIS RAPID imaging plate area detector with graphite monochromated Cu-K $\alpha$  radiation.

Indexing was performed from 3 oscillations that were exposed for 90 seconds. The crystal-to-detector distance was 127.40 mm.

Cell constants and an orientation matrix for data collection corresponded to a primitive monoclinic cell with dimensions:

$$\begin{aligned} a &= 16.2710(3) \text{ \AA} \\ b &= 8.83139(16) \text{ \AA} & \beta &= 102.9857(8)^\circ \\ c &= 17.4864(3) \text{ \AA} \\ V &= 2448.45(8) \text{ \AA}^3 \end{aligned}$$

For  $Z = 4$  and F.W. = 431.57, the calculated density is 1.171 g/cm $^3$ . The systematic absences of:

$$\begin{aligned} h0l: & l \pm 2n \\ 0k0: & k \pm 2n \end{aligned}$$

uniquely determine the space group to be:

$$P2_1/c \text{ (\#14)}$$

The data were collected at a temperature of  $23 \pm 1^\circ\text{C}$  to a maximum  $2\theta$  value of  $136.4^\circ$ . A total of 30 oscillation images were collected. A sweep of data was done using  $\omega$  scans from  $80.0$  to  $260.0^\circ$  in  $30.0^\circ$  step, at  $\chi=54.0^\circ$  and  $\phi = 0.0^\circ$ . The exposure rate was 360.0 [sec./ $^\circ$ ]. A second sweep was performed using  $\omega$  scans from  $80.0$  to  $260.0^\circ$  in  $30.0^\circ$  step, at  $\chi=54.0^\circ$  and  $\phi = 90.0^\circ$ . The exposure rate was 360.0 [sec./ $^\circ$ ]. Another sweep was performed using  $\omega$  scans from  $80.0$  to  $260.0^\circ$  in  $30.0^\circ$  step, at  $\chi=54.0^\circ$  and  $\phi = 180.0^\circ$ . The exposure rate was 360.0 [sec./ $^\circ$ ]. Another sweep was performed using

$\omega$  scans from 80.0 to 260.0 $^\circ$  in 30.0 $^\circ$  step, at  $\chi=54.0^\circ$  and  $\phi = 270.0^\circ$ . The exposure rate was 360.0 [sec./ $^\circ$ ]. Another sweep was performed using  $\omega$  scans from 80.0 to 260.0 $^\circ$  in 30.0 $^\circ$  step, at  $\chi=0.0^\circ$  and  $\phi = 0.0^\circ$ . The exposure rate was 360.0 [sec./ $^\circ$ ]. The crystal-to-detector distance was 127.40 mm. Readout was performed in the 0.100 mm pixel mode.

### Data Reduction

Of the 23572 reflections that were collected, 4462 were unique ( $R_{\text{int}} = 0.050$ ); equivalent reflections were merged.

The linear absorption coefficient,  $\mu$ , for Cu-K $\alpha$  radiation is 5.930 cm $^{-1}$ . An empirical absorption correction was applied which resulted in transmission factors ranging from 0.608 to 0.852. The data were corrected for Lorentz and polarization effects. A correction for secondary extinction<sup>1</sup> was applied (coefficient = 299.450012).

### Structure Solution and Refinement

The structure was solved by direct methods<sup>2</sup> and expanded using Fourier techniques<sup>3</sup>. The non-hydrogen atoms were refined anisotropically. Hydrogen atoms were refined using the riding model. The final cycle of full-matrix least-squares refinement<sup>4</sup> on  $F^2$  was based on 4462 observed reflections and 323 variable parameters and converged (largest parameter shift was 0.00 times its esd) with unweighted and weighted agreement factors of:

$$R1 = \sum ||F_o| - |F_c|| / \sum |F_o| = 0.0500$$

$$wR2 = [ \sum ( w (F_o^2 - F_c^2)^2 ) / \sum w(F_o^2)^2 ]^{1/2} = 0.1743$$

The standard deviation of an observation of unit weight<sup>5</sup> was 1.00. A Sheldrick weighting scheme was used. Plots of  $\sum w (|F_o| - |F_c|)^2$  versus  $|F_o|$ , reflection order in data collection,  $\sin \theta/\lambda$  and various classes of indices showed no unusual trends. The maximum and minimum peaks on the final difference Fourier map corresponded to 0.29 and -0.27 e $^{-}/\text{\AA}^3$ , respectively.

Neutral atom scattering factors were taken from Cromer and Waber<sup>6</sup>. Anomalous dispersion effects were included in  $F_{\text{calc}}$ <sup>7</sup>; the values for  $\Delta f'$  and  $\Delta f''$  were those of Creagh and McAuley<sup>8</sup>. The values for the mass attenuation coefficients are those of Creagh and Hubbell<sup>9</sup>. All calculations were performed using the CrystalStructure<sup>10,11</sup>

crystallographic software package.

### References

(1) Larson, A.C. (1970), Crystallographic Computing, 291-294. F.R. Ahmed, ed. Munksgaard, Copenhagen (equation 22, with V replaced by the cell volume).

(2) SIR92: Altomare, A., Cascarano, G., Giacovazzo, C., Guagliardi, A., Burla, M., Polidori, G., and Camalli, M. (1994) J. Appl. Cryst., 27, 435.

(3) DIRDIF99: Beurskens, P.T., Admiraal, G., Beurskens, G., Bosman, W.P., de Gelder, R., Israel, R. and Smits, J.M.M.(1999). The DIRDIF-99 program system, Technical Report of the Crystallography Laboratory, University of Nijmegen, The Netherlands.

(4) Least Squares function minimized:

$$\sum w(F_o^2 - F_c^2)^2 \quad \text{where } w = \text{Least Squares weights.}$$

(5) Standard deviation of an observation of unit weight:

$$[\sum w(F_o^2 - F_c^2)^2 / (N_o - N_v)]^{1/2}$$

where:  $N_o$  = number of observations  
 $N_v$  = number of variables

(6) Cromer, D. T. & Waber, J. T.; "International Tables for X-ray Crystallography", Vol. IV, The Kynoch Press, Birmingham, England, Table 2.2 A (1974).

(7) Ibers, J. A. & Hamilton, W. C.; Acta Crystallogr., 17, 781 (1964).

(8) Creagh, D. C. & McAuley, W.J. ; "International Tables for Crystallography", Vol C, (A.J.C. Wilson, ed.), Kluwer Academic Publishers, Boston, Table 4.2.6.8, pages 219-222 (1992).

(9) Creagh, D. C. & Hubbell, J.H.; "International Tables for Crystallography", Vol C, (A.J.C. Wilson, ed.), Kluwer Academic Publishers, Boston, Table 4.2.4.3, pages 200-206 (1992).

(10) CrystalStructure 3.8: Crystal Structure Analysis Package, Rigaku and Rigaku Americas (2000-2007). 9009 New Trails Dr. The Woodlands TX 77381 USA.

(11) CRYSTALS Issue 11: Carruthers, J.R., Rollett, J.S., Betteridge, P.W., Kinna, D.,

Pearce, L., Larsen, A., and Gabe, E. Chemical Crystallography Laboratory, Oxford, UK. (1999)

## EXPERIMENTAL DETAILS

### A. Crystal Data

|                      |                                                                                                                 |
|----------------------|-----------------------------------------------------------------------------------------------------------------|
| Empirical Formula    | C <sub>28</sub> H <sub>33</sub> NO <sub>3</sub>                                                                 |
| Formula Weight       | 431.57                                                                                                          |
| Crystal Color, Habit | colorless, unknown                                                                                              |
| Crystal Dimensions   | 0.68 X 0.46 X 0.27 mm                                                                                           |
| Crystal System       | monoclinic                                                                                                      |
| Lattice Type         | Primitive                                                                                                       |
| Indexing Images      | 3 oscillations @ 90.0 seconds                                                                                   |
| Detector Position    | 127.40 mm                                                                                                       |
| Pixel Size           | 0.100 mm                                                                                                        |
| Lattice Parameters   | a = 16.2710(3) Å<br>b = 8.83139(16) Å<br>c = 17.4864(3) Å<br>β = 102.9857(8) °<br>V = 2448.45(8) Å <sup>3</sup> |
| Space Group          | P2 <sub>1</sub> /c (#14)                                                                                        |
| Z value              | 4                                                                                                               |
| D <sub>calc</sub>    | 1.171 g/cm <sup>3</sup>                                                                                         |
| F <sub>000</sub>     | 928.00                                                                                                          |
| μ(CuKα)              | 5.930 cm <sup>-1</sup>                                                                                          |

## B. Intensity Measurements

|                                                        |                                                                            |
|--------------------------------------------------------|----------------------------------------------------------------------------|
| Diffractometer                                         | Rigaku RAXIS-RAPID                                                         |
| Radiation                                              | CuK $\alpha$ ( $\lambda = 1.54187 \text{ \AA}$ )<br>graphite monochromated |
| Detector Aperture                                      | 460 mm x 256 mm                                                            |
| Data Images                                            | 30 exposures                                                               |
| $\omega$ oscillation Range ( $\chi=54.0, \phi=0.0$ )   | 80.0 - 260.0 $^\circ$                                                      |
| Exposure Rate                                          | 360.0 sec./ $^\circ$                                                       |
| $\omega$ oscillation Range ( $\chi=54.0, \phi=90.0$ )  | 80.0 - 260.0 $^\circ$                                                      |
| Exposure Rate                                          | 360.0 sec./ $^\circ$                                                       |
| $\omega$ oscillation Range ( $\chi=54.0, \phi=180.0$ ) | 80.0 - 260.0 $^\circ$                                                      |
| Exposure Rate                                          | 360.0 sec./ $^\circ$                                                       |
| $\omega$ oscillation Range ( $\chi=54.0, \phi=270.0$ ) | 80.0 - 260.0 $^\circ$                                                      |
| Exposure Rate                                          | 360.0 sec./ $^\circ$                                                       |
| $\omega$ oscillation Range ( $\chi=0.0, \phi=0.0$ )    | 80.0 - 260.0 $^\circ$                                                      |
| Exposure Rate                                          | 360.0 sec./ $^\circ$                                                       |
| Detector Position                                      | 127.40 mm                                                                  |
| Pixel Size                                             | 0.100 mm                                                                   |
| $2\theta_{\max}$                                       | 136.4 $^\circ$                                                             |
| No. of Reflections Measured                            | Total: 23572<br>Unique: 4462 ( $R_{\text{int}} = 0.050$ )                  |

Corrections

Lorentz-polarization  
Absorption  
(trans. factors: 0.608 - 0.852)  
Secondary Extinction  
(coefficient: 2.99450e+002)

### C. Structure Solution and Refinement

|                                       |                                                  |
|---------------------------------------|--------------------------------------------------|
| Structure Solution                    | Direct Methods (SIR92)                           |
| Refinement                            | Full-matrix least-squares on $F^2$               |
| Function Minimized                    | $\sum w (F_o^2 - F_c^2)^2$                       |
| Least Squares Weights                 | $1/[0.0030F_o^2 + 1.0000\sigma(F_o^2)]/(4F_o^2)$ |
| $2\theta_{\max}$ cutoff               | 136.4 $^\circ$                                   |
| Anomalous Dispersion                  | All non-hydrogen atoms                           |
| No. Observations (All reflections)    | 4462                                             |
| No. Variables                         | 323                                              |
| Reflection/Parameter Ratio            | 13.81                                            |
| Residuals: R1 ( $I > 2.00\sigma(I)$ ) | 0.0500                                           |
| Residuals: R (All reflections)        | 0.0613                                           |
| Residuals: wR2 (All reflections)      | 0.1743                                           |
| Goodness of Fit Indicator             | 1.004                                            |
| Max Shift/Error in Final Cycle        | 0.000                                            |
| Maximum peak in Final Diff. Map       | 0.29 e $^-/\text{\AA}^3$                         |
| Minimum peak in Final Diff. Map       | -0.27 e $^-/\text{\AA}^3$                        |

Table 1. Atomic coordinates and  $B_{\text{iso}}/B_{\text{eq}}$

| atom  | x           | y            | z           | $B_{\text{eq}}$ |
|-------|-------------|--------------|-------------|-----------------|
| O(2)  | 0.14744(8)  | 0.34684(14)  | 0.42940(7)  | 4.67(2)         |
| O(8)  | 0.07675(9)  | -0.08820(17) | 0.28334(8)  | 5.84(3)         |
| O(16) | 0.02695(10) | -0.2144(2)   | 0.37454(9)  | 6.64(4)         |
| N(1)  | 0.22600(8)  | 0.18863(15)  | 0.52367(7)  | 3.62(2)         |
| C(3)  | 0.20971(10) | 0.22697(19)  | 0.44141(9)  | 3.84(3)         |
| C(4)  | 0.12151(10) | -0.0055(2)   | 0.41288(10) | 4.10(3)         |
| C(5)  | 0.19538(10) | 0.0244(2)    | 0.62518(9)  | 4.04(3)         |
| C(6)  | 0.23167(11) | 0.34173(19)  | 0.55916(9)  | 4.03(3)         |
| C(7)  | 0.18156(11) | 0.09766(19)  | 0.38450(9)  | 4.07(3)         |
| C(9)  | 0.16516(12) | 0.4368(2)    | 0.49972(10) | 4.61(3)         |
| C(10) | 0.31393(11) | 0.4234(2)    | 0.56226(9)  | 4.15(3)         |
| C(11) | 0.29994(13) | 0.5609(2)    | 0.52293(11) | 4.72(4)         |
| C(12) | 0.15743(10) | 0.1029(2)    | 0.54813(9)  | 3.94(3)         |
| C(13) | 0.11317(10) | -0.0048(2)   | 0.48653(10) | 4.24(3)         |
| C(14) | 0.25566(12) | -0.0870(2)   | 0.62759(11) | 4.65(4)         |
| C(15) | 0.39562(12) | 0.3772(2)    | 0.60014(10) | 4.53(3)         |
| C(17) | 0.25860(12) | 0.0083(2)    | 0.37060(12) | 5.01(4)         |
| C(18) | 0.06979(12) | -0.1156(2)   | 0.35677(11) | 4.77(4)         |
| C(19) | 0.36698(16) | 0.6564(2)    | 0.52006(13) | 5.74(5)         |
| C(20) | 0.41228(12) | 0.2241(2)    | 0.64006(12) | 5.09(4)         |
| C(21) | 0.46098(14) | 0.4763(2)    | 0.59723(13) | 5.59(4)         |
| C(22) | 0.20793(14) | 0.5869(2)    | 0.48938(12) | 5.37(4)         |
| C(23) | 0.17273(14) | 0.0646(2)    | 0.69419(11) | 5.36(4)         |
| C(24) | 0.44744(16) | 0.6137(2)    | 0.55831(14) | 6.15(5)         |
| C(25) | 0.29355(14) | -0.1558(2)   | 0.69713(13) | 5.86(5)         |
| C(26) | 0.03064(15) | -0.1853(3)   | 0.22104(13) | 6.73(5)         |
| C(27) | 0.21079(17) | -0.0039(3)   | 0.76396(12) | 6.78(6)         |
| C(28) | 0.27113(17) | -0.1135(2)   | 0.76599(13) | 6.63(5)         |
| C(29) | 0.44486(19) | 0.1131(3)    | 0.58792(18) | 7.70(7)         |
| C(30) | 0.05824(16) | -0.1490(4)   | 0.14976(14) | 8.67(8)         |
| C(31) | 0.47121(15) | 0.2339(3)    | 0.72044(15) | 7.68(6)         |
| C(32) | 0.3042(2)   | 0.0815(3)    | 0.3153(2)   | 9.51(9)         |

$$B_{\text{eq}} = 8/3 \pi^2 (U_{11}(\text{aa}^*)^2 + U_{22}(\text{bb}^*)^2 + U_{33}(\text{cc}^*)^2 + 2U_{12}(\text{aa}^*\text{bb}^*)\cos \gamma + 2U_{13}(\text{aa}^*\text{cc}^*)\cos \beta + 2U_{23}(\text{bb}^*\text{cc}^*)\cos \alpha)$$

Table 2. Atomic coordinates and  $B_{iso}$  involving hydrogens/ $B_{eq}$

| atom  | x       | y       | z      | $B_{eq}$ |
|-------|---------|---------|--------|----------|
| H(1)  | 0.5166  | 0.4479  | 0.6231 | 6.66     |
| H(2)  | 0.0773  | -0.0788 | 0.5012 | 4.99     |
| H(3)  | 0.2707  | -0.1159 | 0.5802 | 5.49     |
| H(4)  | 0.3575  | 0.7492  | 0.4920 | 7.07     |
| H(5)  | 0.4939  | 0.6785  | 0.5575 | 7.55     |
| H(6)  | 0.1305  | 0.1395  | 0.6929 | 6.52     |
| H(7)  | 0.3347  | -0.2327 | 0.6981 | 6.75     |
| H(8)  | 0.1950  | 0.0243  | 0.8111 | 8.15     |
| H(9)  | 0.2975  | -0.1588 | 0.8146 | 7.63     |
| H(10) | 0.2192  | 0.3384  | 0.6097 | 4.75     |
| H(11) | 0.1532  | 0.1389  | 0.3355 | 4.78     |
| H(12) | 0.1153  | 0.4515  | 0.5184 | 5.41     |
| H(13) | 0.1174  | 0.1745  | 0.5577 | 4.66     |
| H(14) | 0.2967  | -0.0043 | 0.4200 | 6.04     |
| H(15) | 0.2400  | -0.0881 | 0.3495 | 6.01     |
| H(16) | 0.1981  | 0.6117  | 0.4352 | 6.29     |
| H(17) | 0.1875  | 0.6661  | 0.5168 | 6.27     |
| H(18) | 0.0433  | -0.2884 | 0.2341 | 7.82     |
| H(19) | -0.0284 | -0.1692 | 0.2136 | 7.80     |
| H(20) | 0.3598  | 0.1855  | 0.6466 | 5.90     |
| H(21) | 0.3998  | 0.0621  | 0.5536 | 9.14     |
| H(22) | 0.4801  | 0.0412  | 0.6200 | 9.10     |
| H(23) | 0.4769  | 0.1679  | 0.5579 | 9.09     |
| H(24) | 0.0230  | -0.0713 | 0.1226 | 10.28    |
| H(25) | 0.0553  | -0.2352 | 0.1168 | 10.26    |
| H(26) | 0.1148  | -0.1137 | 0.1639 | 10.28    |
| H(27) | 0.5277  | 0.2217  | 0.7153 | 8.82     |
| H(28) | 0.4581  | 0.1569  | 0.7537 | 8.83     |
| H(29) | 0.4650  | 0.3303  | 0.7425 | 8.81     |
| H(30) | 0.2810  | 0.0494  | 0.2631 | 12.34    |
| H(31) | 0.3623  | 0.0560  | 0.3293 | 12.32    |
| H(32) | 0.2979  | 0.1880  | 0.3189 | 12.31    |
| H(33) | 0.2602  | 0.2678  | 0.4311 | 4.50     |

$$B_{eq} = 8/3 \pi^2 (U_{11}(aa^*)^2 + U_{22}(bb^*)^2 + U_{33}(cc^*)^2 + 2U_{12}(aa^*bb^*)\cos \gamma + 2U_{13}(aa^*cc^*)\cos \beta + 2U_{23}(bb^*cc^*)\cos \alpha)$$

Table 3. Anisotropic displacement parameters

| atom  | U <sub>11</sub> | U <sub>22</sub> | U <sub>33</sub> | U <sub>12</sub> | U <sub>13</sub> | U <sub>23</sub> |
|-------|-----------------|-----------------|-----------------|-----------------|-----------------|-----------------|
| O(2)  | 0.0694(7)       | 0.0522(7)       | 0.0474(6)       | 0.0154(5)       | -0.0045(5)      | -0.0036(5)      |
| O(8)  | 0.0782(9)       | 0.0863(10)      | 0.0512(7)       | -0.0158(7)      | 0.0016(6)       | -0.0175(6)      |
| O(16) | 0.0854(10)      | 0.0863(10)      | 0.0739(9)       | -0.0250(8)      | 0.0036(7)       | -0.0105(7)      |
| N(1)  | 0.0500(7)       | 0.0465(7)       | 0.0385(6)       | 0.0026(5)       | 0.0049(5)       | -0.0014(5)      |
| C(3)  | 0.0532(8)       | 0.0493(9)       | 0.0409(7)       | 0.0083(7)       | 0.0050(6)       | 0.0013(6)       |
| C(4)  | 0.0482(8)       | 0.0539(9)       | 0.0490(8)       | 0.0052(7)       | 0.0009(6)       | -0.0040(7)      |
| C(5)  | 0.0549(9)       | 0.0536(9)       | 0.0436(8)       | -0.0038(7)      | 0.0083(7)       | -0.0009(7)      |
| C(6)  | 0.0591(9)       | 0.0502(9)       | 0.0417(8)       | 0.0047(7)       | 0.0068(7)       | -0.0041(6)      |
| C(7)  | 0.0577(9)       | 0.0527(9)       | 0.0411(8)       | 0.0049(7)       | 0.0046(6)       | -0.0021(6)      |
| C(9)  | 0.0651(10)      | 0.0563(10)      | 0.0502(9)       | 0.0156(8)       | 0.0056(7)       | -0.0060(7)      |
| C(10) | 0.0640(10)      | 0.0499(9)       | 0.0417(8)       | 0.0006(7)       | 0.0075(7)       | -0.0066(6)      |
| C(11) | 0.0826(12)      | 0.0475(9)       | 0.0500(9)       | 0.0053(8)       | 0.0164(8)       | -0.0063(7)      |
| C(12) | 0.0487(8)       | 0.0547(9)       | 0.0450(8)       | 0.0041(7)       | 0.0080(6)       | -0.0015(7)      |
| C(13) | 0.0471(8)       | 0.0577(10)      | 0.0532(9)       | -0.0007(7)      | 0.0043(7)       | 0.0013(7)       |
| C(14) | 0.0618(10)      | 0.0565(10)      | 0.0554(10)      | 0.0015(8)       | 0.0070(8)       | 0.0026(7)       |
| C(15) | 0.0606(10)      | 0.0579(10)      | 0.0510(9)       | -0.0026(8)      | 0.0072(7)       | -0.0042(7)      |
| C(17) | 0.0636(10)      | 0.0611(11)      | 0.0652(11)      | 0.0052(8)       | 0.0137(9)       | -0.0121(8)      |
| C(18) | 0.0543(9)       | 0.0643(11)      | 0.0569(10)      | -0.0014(8)      | 0.0002(7)       | -0.0060(8)      |
| C(19) | 0.1026(16)      | 0.0489(10)      | 0.0722(12)      | -0.0025(10)     | 0.0319(11)      | -0.0026(9)      |
| C(20) | 0.0548(9)       | 0.0669(11)      | 0.0649(11)      | 0.0000(8)       | -0.0004(8)      | 0.0097(9)       |
| C(21) | 0.0671(11)      | 0.0695(13)      | 0.0746(12)      | -0.0056(10)     | 0.0131(10)      | -0.0061(10)     |
| C(22) | 0.0908(13)      | 0.0484(10)      | 0.0594(10)      | 0.0156(9)       | 0.0057(9)       | -0.0037(8)      |
| C(23) | 0.0829(13)      | 0.0717(12)      | 0.0517(10)      | 0.0000(10)      | 0.0210(9)       | 0.0004(8)       |
| C(24) | 0.0881(15)      | 0.0627(12)      | 0.0887(15)      | -0.0159(11)     | 0.0324(12)      | -0.0098(11)     |
| C(25) | 0.0735(12)      | 0.0652(12)      | 0.0737(13)      | 0.0003(10)      | -0.0053(10)     | 0.0141(10)      |
| C(26) | 0.0769(13)      | 0.1063(18)      | 0.0639(12)      | -0.0154(13)     | -0.0022(10)     | -0.0326(12)     |
| C(27) | 0.123(2)        | 0.0885(16)      | 0.0470(10)      | -0.0086(15)     | 0.0210(11)      | 0.0052(10)      |
| C(28) | 0.1040(17)      | 0.0823(15)      | 0.0548(12)      | -0.0155(14)     | -0.0049(11)     | 0.0200(10)      |
| C(29) | 0.108(2)        | 0.0695(15)      | 0.1085(19)      | 0.0159(14)      | 0.0115(15)      | 0.0007(13)      |
| C(30) | 0.0771(15)      | 0.180(3)        | 0.0671(14)      | 0.0007(17)      | 0.0045(11)      | -0.0488(17)     |
| C(31) | 0.0846(15)      | 0.117(2)        | 0.0763(15)      | 0.0034(15)      | -0.0118(12)     | 0.0155(14)      |
| C(32) | 0.133(2)        | 0.112(2)        | 0.145(2)        | 0.0230(19)      | 0.091(2)        | 0.0079(19)      |

The general temperature factor expression:  $\exp(-2\pi^2(a^2U_{11}h^2 + b^2U_{22}k^2 + c^2U_{33}l^2 + 2a*b*U_{12}hk + 2a*c*U_{13}hl + 2b*c*U_{23}kl))$

Table 4. Bond lengths (Å)

| atom  | atom  | distance | atom  | atom  | distance   |
|-------|-------|----------|-------|-------|------------|
| O(2)  | C(3)  | 1.448(2) | O(2)  | C(9)  | 1.437(2)   |
| O(8)  | C(18) | 1.336(2) | O(8)  | C(26) | 1.455(2)   |
| O(16) | C(18) | 1.200(2) | N(1)  | C(3)  | 1.4431(19) |
| N(1)  | C(6)  | 1.482(2) | N(1)  | C(12) | 1.488(2)   |
| C(3)  | C(7)  | 1.516(2) | C(4)  | C(7)  | 1.500(2)   |
| C(4)  | C(13) | 1.325(2) | C(4)  | C(18) | 1.499(2)   |
| C(5)  | C(12) | 1.518(2) | C(5)  | C(14) | 1.383(2)   |
| C(5)  | C(23) | 1.385(2) | C(6)  | C(9)  | 1.565(2)   |
| C(6)  | C(10) | 1.511(2) | C(7)  | C(17) | 1.546(2)   |
| C(9)  | C(22) | 1.527(2) | C(10) | C(11) | 1.389(2)   |
| C(10) | C(15) | 1.406(2) | C(11) | C(19) | 1.389(3)   |
| C(11) | C(22) | 1.498(2) | C(12) | C(13) | 1.495(2)   |
| C(14) | C(25) | 1.375(2) | C(15) | C(20) | 1.518(2)   |
| C(15) | C(21) | 1.387(3) | C(17) | C(32) | 1.491(4)   |
| C(19) | C(24) | 1.382(3) | C(20) | C(29) | 1.513(3)   |
| C(20) | C(31) | 1.516(2) | C(21) | C(24) | 1.385(3)   |
| C(23) | C(27) | 1.378(2) | C(25) | C(28) | 1.386(3)   |
| C(26) | C(30) | 1.452(3) | C(27) | C(28) | 1.373(3)   |

Table 5. Bond lengths involving hydrogens (Å)

| atom  | atom  | distance | atom  | atom  | distance |
|-------|-------|----------|-------|-------|----------|
| C(3)  | H(33) | 0.950    | C(6)  | H(10) | 0.950    |
| C(7)  | H(11) | 0.950    | C(9)  | H(12) | 0.950    |
| C(12) | H(13) | 0.950    | C(13) | H(2)  | 0.950    |
| C(14) | H(3)  | 0.950    | C(17) | H(14) | 0.950    |
| C(17) | H(15) | 0.950    | C(19) | H(4)  | 0.950    |
| C(20) | H(20) | 0.950    | C(21) | H(1)  | 0.950    |
| C(22) | H(16) | 0.950    | C(22) | H(17) | 0.950    |
| C(23) | H(6)  | 0.950    | C(24) | H(5)  | 0.950    |
| C(25) | H(7)  | 0.950    | C(26) | H(18) | 0.950    |
| C(26) | H(19) | 0.950    | C(27) | H(8)  | 0.950    |
| C(28) | H(9)  | 0.950    | C(29) | H(21) | 0.950    |
| C(29) | H(22) | 0.950    | C(29) | H(23) | 0.950    |
| C(30) | H(24) | 0.950    | C(30) | H(25) | 0.950    |
| C(30) | H(26) | 0.950    | C(31) | H(27) | 0.950    |
| C(31) | H(28) | 0.950    | C(31) | H(29) | 0.950    |
| C(32) | H(30) | 0.950    | C(32) | H(31) | 0.950    |
| C(32) | H(32) | 0.950    |       |       |          |

Table 6. Bond angles (°)

| atom  | atom  | atom  | angle      | atom  | atom  | atom  | angle      |
|-------|-------|-------|------------|-------|-------|-------|------------|
| C(3)  | O(2)  | C(9)  | 106.29(11) | C(18) | O(8)  | C(26) | 118.15(17) |
| C(3)  | N(1)  | C(6)  | 100.58(11) | C(3)  | N(1)  | C(12) | 115.10(11) |
| C(6)  | N(1)  | C(12) | 108.89(13) | O(2)  | C(3)  | N(1)  | 106.38(13) |
| O(2)  | C(3)  | C(7)  | 110.93(11) | N(1)  | C(3)  | C(7)  | 115.99(13) |
| C(7)  | C(4)  | C(13) | 122.38(14) | C(7)  | C(4)  | C(18) | 119.30(15) |
| C(13) | C(4)  | C(18) | 118.32(16) | C(12) | C(5)  | C(14) | 119.76(15) |
| C(12) | C(5)  | C(23) | 121.42(16) | C(14) | C(5)  | C(23) | 118.79(15) |
| N(1)  | C(6)  | C(9)  | 104.03(11) | N(1)  | C(6)  | C(10) | 114.95(14) |
| C(9)  | C(6)  | C(10) | 104.05(13) | C(3)  | C(7)  | C(4)  | 111.31(14) |
| C(3)  | C(7)  | C(17) | 110.58(13) | C(4)  | C(7)  | C(17) | 110.71(14) |
| O(2)  | C(9)  | C(6)  | 104.34(13) | O(2)  | C(9)  | C(22) | 112.80(15) |
| C(6)  | C(9)  | C(22) | 106.18(14) | C(6)  | C(10) | C(11) | 110.75(14) |
| C(6)  | C(10) | C(15) | 127.93(15) | C(11) | C(10) | C(15) | 121.30(17) |
| C(10) | C(11) | C(19) | 120.41(17) | C(10) | C(11) | C(22) | 111.47(17) |
| C(19) | C(11) | C(22) | 128.10(17) | N(1)  | C(12) | C(5)  | 107.81(11) |
| N(1)  | C(12) | C(13) | 112.79(13) | C(5)  | C(12) | C(13) | 112.51(14) |
| C(4)  | C(13) | C(12) | 124.43(16) | C(5)  | C(14) | C(25) | 121.01(19) |
| C(10) | C(15) | C(20) | 121.83(16) | C(10) | C(15) | C(21) | 116.82(17) |
| C(20) | C(15) | C(21) | 121.32(16) | C(7)  | C(17) | C(32) | 114.81(18) |
| O(8)  | C(18) | O(16) | 124.06(17) | O(8)  | C(18) | C(4)  | 110.80(16) |
| O(16) | C(18) | C(4)  | 125.13(18) | C(11) | C(19) | C(24) | 118.91(19) |
| C(15) | C(20) | C(29) | 110.51(19) | C(15) | C(20) | C(31) | 112.71(18) |
| C(29) | C(20) | C(31) | 111.19(19) | C(15) | C(21) | C(24) | 122.17(19) |
| C(9)  | C(22) | C(11) | 105.23(15) | C(5)  | C(23) | C(27) | 120.3(2)   |
| C(19) | C(24) | C(21) | 120.4(2)   | C(14) | C(25) | C(28) | 119.7(2)   |
| O(8)  | C(26) | C(30) | 107.8(2)   | C(23) | C(27) | C(28) | 120.6(2)   |
| C(25) | C(28) | C(27) | 119.6(2)   |       |       |       |            |

Table 7. Bond angles involving hydrogens ( $^{\circ}$ )

| atom  | atom  | atom  | angle | atom  | atom  | atom  | angle |
|-------|-------|-------|-------|-------|-------|-------|-------|
| O(2)  | C(3)  | H(33) | 107.5 | N(1)  | C(3)  | H(33) | 107.7 |
| C(7)  | C(3)  | H(33) | 108.0 | N(1)  | C(6)  | H(10) | 110.8 |
| C(9)  | C(6)  | H(10) | 111.9 | C(10) | C(6)  | H(10) | 110.7 |
| C(3)  | C(7)  | H(11) | 108.5 | C(4)  | C(7)  | H(11) | 108.1 |
| C(17) | C(7)  | H(11) | 107.5 | O(2)  | C(9)  | H(12) | 110.3 |
| C(6)  | C(9)  | H(12) | 111.2 | C(22) | C(9)  | H(12) | 111.7 |
| N(1)  | C(12) | H(13) | 107.5 | C(5)  | C(12) | H(13) | 107.8 |
| C(13) | C(12) | H(13) | 108.2 | C(4)  | C(13) | H(2)  | 117.6 |
| C(12) | C(13) | H(2)  | 118.0 | C(5)  | C(14) | H(3)  | 119.0 |
| C(25) | C(14) | H(3)  | 120.0 | C(7)  | C(17) | H(14) | 107.6 |
| C(7)  | C(17) | H(15) | 108.6 | C(32) | C(17) | H(14) | 108.9 |
| C(32) | C(17) | H(15) | 107.4 | H(14) | C(17) | H(15) | 109.5 |
| C(11) | C(19) | H(4)  | 120.3 | C(24) | C(19) | H(4)  | 120.8 |
| C(15) | C(20) | H(20) | 107.6 | C(29) | C(20) | H(20) | 106.6 |
| C(31) | C(20) | H(20) | 107.9 | C(15) | C(21) | H(1)  | 118.2 |
| C(24) | C(21) | H(1)  | 119.6 | C(9)  | C(22) | H(16) | 109.8 |
| C(9)  | C(22) | H(17) | 111.0 | C(11) | C(22) | H(16) | 110.8 |
| C(11) | C(22) | H(17) | 110.4 | H(16) | C(22) | H(17) | 109.5 |
| C(5)  | C(23) | H(6)  | 119.3 | C(27) | C(23) | H(6)  | 120.4 |
| C(19) | C(24) | H(5)  | 119.9 | C(21) | C(24) | H(5)  | 119.7 |
| C(14) | C(25) | H(7)  | 120.4 | C(28) | C(25) | H(7)  | 119.9 |
| O(8)  | C(26) | H(18) | 109.7 | O(8)  | C(26) | H(19) | 110.4 |
| C(30) | C(26) | H(18) | 109.1 | C(30) | C(26) | H(19) | 110.4 |
| H(18) | C(26) | H(19) | 109.5 | C(23) | C(27) | H(8)  | 119.9 |
| C(28) | C(27) | H(8)  | 119.6 | C(25) | C(28) | H(9)  | 120.6 |
| C(27) | C(28) | H(9)  | 119.8 | C(20) | C(29) | H(21) | 111.3 |
| C(20) | C(29) | H(22) | 108.9 | C(20) | C(29) | H(23) | 108.2 |
| H(21) | C(29) | H(22) | 109.5 | H(21) | C(29) | H(23) | 109.5 |
| H(22) | C(29) | H(23) | 109.5 | C(26) | C(30) | H(24) | 108.7 |
| C(26) | C(30) | H(25) | 111.1 | C(26) | C(30) | H(26) | 108.5 |
| H(24) | C(30) | H(25) | 109.5 | H(24) | C(30) | H(26) | 109.5 |
| H(25) | C(30) | H(26) | 109.5 | C(20) | C(31) | H(27) | 109.3 |
| C(20) | C(31) | H(28) | 110.2 | C(20) | C(31) | H(29) | 109.0 |
| H(27) | C(31) | H(28) | 109.5 | H(27) | C(31) | H(29) | 109.5 |
| H(28) | C(31) | H(29) | 109.5 | C(17) | C(32) | H(30) | 110.3 |
| C(17) | C(32) | H(31) | 110.0 | C(17) | C(32) | H(32) | 108.0 |
| H(30) | C(32) | H(31) | 109.5 | H(30) | C(32) | H(32) | 109.5 |

Table 7. Bond angles involving hydrogens ( $^{\circ}$ ) (continued)

| atom  | atom  | atom  | angle | atom | atom | atom | angle |
|-------|-------|-------|-------|------|------|------|-------|
| H(31) | C(32) | H(32) | 109.5 |      |      |      |       |

Table 8. Torsion Angles(°)

| atom1 | atom2 | atom3 | atom4 | angle       | atom1 | atom2 | atom3 | atom4 | angle       |
|-------|-------|-------|-------|-------------|-------|-------|-------|-------|-------------|
| C(3)  | O(2)  | C(9)  | C(6)  | -10.36(17)  | C(3)  | O(2)  | C(9)  | C(22) | 104.44(16)  |
| C(9)  | O(2)  | C(3)  | N(1)  | 34.52(16)   | C(9)  | O(2)  | C(3)  | C(7)  | 161.49(14)  |
| C(18) | O(8)  | C(26) | C(30) | -171.26(19) | C(26) | O(8)  | C(18) | O(16) | -1.0(3)     |
| C(26) | O(8)  | C(18) | C(4)  | 179.81(16)  | C(3)  | N(1)  | C(6)  | C(9)  | 35.46(16)   |
| C(3)  | N(1)  | C(6)  | C(10) | -77.63(14)  | C(6)  | N(1)  | C(3)  | O(2)  | -43.64(14)  |
| C(6)  | N(1)  | C(3)  | C(7)  | -167.52(14) | C(3)  | N(1)  | C(12) | C(5)  | 159.81(13)  |
| C(3)  | N(1)  | C(12) | C(13) | 34.99(18)   | C(12) | N(1)  | C(3)  | O(2)  | 73.18(16)   |
| C(12) | N(1)  | C(3)  | C(7)  | -50.70(19)  | C(6)  | N(1)  | C(12) | C(5)  | -88.19(14)  |
| C(6)  | N(1)  | C(12) | C(13) | 146.98(13)  | C(12) | N(1)  | C(6)  | C(9)  | -85.87(14)  |
| C(12) | N(1)  | C(6)  | C(10) | 161.04(12)  | O(2)  | C(3)  | C(7)  | C(4)  | -81.78(16)  |
| O(2)  | C(3)  | C(7)  | C(17) | 154.72(14)  | N(1)  | C(3)  | C(7)  | C(4)  | 39.71(19)   |
| N(1)  | C(3)  | C(7)  | C(17) | -83.80(18)  | C(7)  | C(4)  | C(13) | C(12) | 3.9(2)      |
| C(13) | C(4)  | C(7)  | C(3)  | -16.5(2)    | C(13) | C(4)  | C(7)  | C(17) | 106.90(18)  |
| C(7)  | C(4)  | C(18) | O(8)  | -9.5(2)     | C(7)  | C(4)  | C(18) | O(16) | 171.32(18)  |
| C(18) | C(4)  | C(7)  | C(3)  | 164.52(14)  | C(18) | C(4)  | C(7)  | C(17) | -72.05(18)  |
| C(13) | C(4)  | C(18) | O(8)  | 171.54(16)  | C(13) | C(4)  | C(18) | O(16) | -7.7(2)     |
| C(18) | C(4)  | C(13) | C(12) | -177.10(15) | C(12) | C(5)  | C(14) | C(25) | 177.39(17)  |
| C(14) | C(5)  | C(12) | N(1)  | -64.67(19)  | C(14) | C(5)  | C(12) | C(13) | 60.3(2)     |
| C(12) | C(5)  | C(23) | C(27) | -177.17(19) | C(23) | C(5)  | C(12) | N(1)  | 113.50(18)  |
| C(23) | C(5)  | C(12) | C(13) | -121.51(19) | C(14) | C(5)  | C(23) | C(27) | 1.0(3)      |
| C(23) | C(5)  | C(14) | C(25) | -0.8(2)     | N(1)  | C(6)  | C(9)  | O(2)  | -15.91(18)  |
| N(1)  | C(6)  | C(9)  | C(22) | -135.30(15) | N(1)  | C(6)  | C(10) | C(11) | 122.30(15)  |
| N(1)  | C(6)  | C(10) | C(15) | -59.4(2)    | C(9)  | C(6)  | C(10) | C(11) | 9.22(19)    |
| C(9)  | C(6)  | C(10) | C(15) | -172.53(17) | C(10) | C(6)  | C(9)  | O(2)  | 104.80(15)  |
| C(10) | C(6)  | C(9)  | C(22) | -14.59(18)  | C(3)  | C(7)  | C(17) | C(32) | -78.5(2)    |
| C(4)  | C(7)  | C(17) | C(32) | 157.64(18)  | O(2)  | C(9)  | C(22) | C(11) | -99.01(17)  |
| C(6)  | C(9)  | C(22) | C(11) | 14.7(2)     | C(6)  | C(10) | C(11) | C(19) | 178.50(18)  |
| C(6)  | C(10) | C(11) | C(22) | -0.01(18)   | C(6)  | C(10) | C(15) | C(20) | 4.8(2)      |
| C(6)  | C(10) | C(15) | C(21) | -177.18(18) | C(11) | C(10) | C(15) | C(20) | -177.09(18) |
| C(11) | C(10) | C(15) | C(21) | 0.9(2)      | C(15) | C(10) | C(11) | C(19) | 0.1(2)      |
| C(15) | C(10) | C(11) | C(22) | -178.40(17) | C(10) | C(11) | C(19) | C(24) | -1.3(3)     |
| C(10) | C(11) | C(22) | C(9)  | -9.5(2)     | C(19) | C(11) | C(22) | C(9)  | 172.1(2)    |
| C(22) | C(11) | C(19) | C(24) | 176.9(2)    | N(1)  | C(12) | C(13) | C(4)  | -12.3(2)    |
| C(5)  | C(12) | C(13) | C(4)  | -134.50(17) | C(5)  | C(14) | C(25) | C(28) | 0.1(2)      |
| C(10) | C(15) | C(20) | C(29) | 100.2(2)    | C(10) | C(15) | C(20) | C(31) | -134.67(19) |
| C(10) | C(15) | C(21) | C(24) | -0.7(3)     | C(20) | C(15) | C(21) | C(24) | 177.3(2)    |
| C(21) | C(15) | C(20) | C(29) | -77.7(2)    | C(21) | C(15) | C(20) | C(31) | 47.4(2)     |

Table 8. Torsion angles ( $^{\circ}$ ) (continued)

| atom1 | atom2 | atom3 | atom4 | angle   | atom1 | atom2 | atom3 | atom4 | angle   |
|-------|-------|-------|-------|---------|-------|-------|-------|-------|---------|
| C(11) | C(19) | C(24) | C(21) | 1.5(3)  | C(15) | C(21) | C(24) | C(19) | -0.5(3) |
| C(5)  | C(23) | C(27) | C(28) | -0.5(3) | C(14) | C(25) | C(28) | C(27) | 0.5(3)  |
| C(23) | C(27) | C(28) | C(25) | -0.3(3) |       |       |       |       |         |

The sign is positive if when looking from atom 2 to atom 3 a clock-wise motion of atom 1 would superimpose it on atom 4.

Table 9. Distances beyond the asymmetric unit out to 3.60 Å

| atom  | atom                | distance | atom  | atom                | distance |
|-------|---------------------|----------|-------|---------------------|----------|
| O(2)  | C(26) <sup>1)</sup> | 3.460(2) | O(2)  | C(27) <sup>2)</sup> | 3.563(2) |
| O(2)  | C(30) <sup>1)</sup> | 3.322(2) | O(16) | C(23) <sup>3)</sup> | 3.463(2) |
| C(21) | C(24) <sup>4)</sup> | 3.474(3) | C(23) | O(16) <sup>3)</sup> | 3.463(2) |
| C(24) | C(21) <sup>4)</sup> | 3.474(3) | C(24) | C(24) <sup>4)</sup> | 3.562(3) |
| C(26) | O(2) <sup>5)</sup>  | 3.460(2) | C(27) | O(2) <sup>6)</sup>  | 3.563(2) |
| C(30) | O(2) <sup>5)</sup>  | 3.322(2) |       |                     |          |

Symmetry Operators:

- |                       |                      |
|-----------------------|----------------------|
| (1) -X,Y+1/2,-Z+1/2   | (2) X,-Y+1/2,Z+1/2-1 |
| (3) -X,-Y,-Z+1        | (4) -X+1,-Y+1,-Z+1   |
| (5) -X,Y+1/2-1,-Z+1/2 | (6) X,-Y+1/2,Z+1/2   |

Table 10. Distances beyond the asymmetric unit out to 3.60 Å involving hydrogens

| atom  | atom                 | distance | atom  | atom                 | distance |
|-------|----------------------|----------|-------|----------------------|----------|
| O(2)  | H(8) <sup>1)</sup>   | 2.625    | O(2)  | H(19) <sup>2)</sup>  | 2.802    |
| O(2)  | H(24) <sup>2)</sup>  | 2.812    | O(2)  | H(25) <sup>2)</sup>  | 3.296    |
| O(8)  | H(6) <sup>3)</sup>   | 3.519    | O(8)  | H(18) <sup>2)</sup>  | 3.264    |
| O(16) | H(6) <sup>3)</sup>   | 2.652    | O(16) | H(13) <sup>3)</sup>  | 2.879    |
| O(16) | H(16) <sup>4)</sup>  | 3.148    | O(16) | H(17) <sup>4)</sup>  | 3.347    |
| O(16) | H(24) <sup>5)</sup>  | 3.258    | C(3)  | H(8) <sup>1)</sup>   | 3.136    |
| C(4)  | H(16) <sup>4)</sup>  | 3.594    | C(4)  | H(17) <sup>4)</sup>  | 3.462    |
| C(5)  | H(25) <sup>6)</sup>  | 3.404    | C(7)  | H(19) <sup>2)</sup>  | 3.387    |
| C(9)  | H(8) <sup>1)</sup>   | 3.457    | C(9)  | H(24) <sup>2)</sup>  | 3.318    |
| C(9)  | H(26) <sup>7)</sup>  | 3.523    | C(11) | H(3) <sup>8)</sup>   | 3.097    |
| C(11) | H(7) <sup>8)</sup>   | 3.500    | C(13) | H(2) <sup>3)</sup>   | 3.239    |
| C(13) | H(17) <sup>4)</sup>  | 3.146    | C(13) | H(25) <sup>6)</sup>  | 3.509    |
| C(14) | H(4) <sup>4)</sup>   | 3.497    | C(14) | H(17) <sup>4)</sup>  | 2.962    |
| C(14) | H(25) <sup>6)</sup>  | 3.584    | C(17) | H(4) <sup>4)</sup>   | 3.286    |
| C(17) | H(9) <sup>9)</sup>   | 3.341    | C(18) | H(6) <sup>3)</sup>   | 3.186    |
| C(18) | H(16) <sup>4)</sup>  | 3.279    | C(18) | H(17) <sup>4)</sup>  | 3.578    |
| C(18) | H(18) <sup>2)</sup>  | 3.599    | C(19) | H(1) <sup>10)</sup>  | 3.583    |
| C(19) | H(3) <sup>8)</sup>   | 2.889    | C(19) | H(7) <sup>8)</sup>   | 3.416    |
| C(19) | H(9) <sup>1)</sup>   | 3.516    | C(19) | H(14) <sup>8)</sup>  | 3.528    |
| C(19) | H(23) <sup>10)</sup> | 3.505    | C(21) | H(5) <sup>10)</sup>  | 3.260    |
| C(21) | H(28) <sup>11)</sup> | 3.087    | C(22) | H(3) <sup>8)</sup>   | 3.119    |
| C(22) | H(8) <sup>1)</sup>   | 3.230    | C(23) | H(18) <sup>6)</sup>  | 3.397    |
| C(23) | H(19) <sup>3)</sup>  | 3.267    | C(23) | H(25) <sup>6)</sup>  | 3.575    |
| C(23) | H(32) <sup>7)</sup>  | 3.418    | C(24) | H(1) <sup>10)</sup>  | 3.397    |
| C(24) | H(5) <sup>10)</sup>  | 3.542    | C(24) | H(23) <sup>10)</sup> | 3.240    |
| C(24) | H(28) <sup>11)</sup> | 3.323    | C(25) | H(17) <sup>4)</sup>  | 3.599    |
| C(25) | H(26) <sup>6)</sup>  | 3.490    | C(25) | H(27) <sup>12)</sup> | 3.157    |
| C(26) | H(6) <sup>3)</sup>   | 3.329    | C(26) | H(11) <sup>5)</sup>  | 3.317    |
| C(27) | H(16) <sup>7)</sup>  | 3.193    | C(27) | H(18) <sup>6)</sup>  | 3.229    |
| C(27) | H(19) <sup>3)</sup>  | 3.439    | C(27) | H(32) <sup>7)</sup>  | 3.178    |
| C(27) | H(33) <sup>7)</sup>  | 3.533    | C(28) | H(15) <sup>6)</sup>  | 3.110    |
| C(28) | H(16) <sup>7)</sup>  | 3.428    | C(28) | H(27) <sup>12)</sup> | 3.529    |
| C(29) | H(5) <sup>10)</sup>  | 3.463    | C(29) | H(31) <sup>13)</sup> | 3.482    |
| C(30) | H(12) <sup>1)</sup>  | 3.183    | C(30) | H(17) <sup>1)</sup>  | 3.471    |
| C(31) | H(7) <sup>11)</sup>  | 3.174    | C(31) | H(31) <sup>7)</sup>  | 3.424    |
| C(32) | H(29) <sup>1)</sup>  | 3.252    | H(1)  | C(19) <sup>10)</sup> | 3.583    |
| H(1)  | C(24) <sup>10)</sup> | 3.397    | H(1)  | H(5) <sup>10)</sup>  | 3.319    |

Table 10. Distances beyond the asymmetric unit out to 3.60 Å involving hydrogens (continued)

| atom  | atom                 | distance | atom  | atom                 | distance |
|-------|----------------------|----------|-------|----------------------|----------|
| H(1)  | H(9) <sup>11)</sup>  | 3.122    | H(1)  | H(28) <sup>11)</sup> | 2.795    |
| H(2)  | C(13) <sup>3)</sup>  | 3.239    | H(2)  | H(2) <sup>3)</sup>   | 2.866    |
| H(2)  | H(13) <sup>3)</sup>  | 3.215    | H(2)  | H(17) <sup>4)</sup>  | 2.854    |
| H(2)  | H(25) <sup>6)</sup>  | 2.689    | H(3)  | C(11) <sup>4)</sup>  | 3.097    |
| H(3)  | C(19) <sup>4)</sup>  | 2.889    | H(3)  | C(22) <sup>4)</sup>  | 3.119    |
| H(3)  | H(4) <sup>4)</sup>   | 2.603    | H(3)  | H(16) <sup>4)</sup>  | 3.502    |
| H(3)  | H(17) <sup>4)</sup>  | 2.469    | H(4)  | C(14) <sup>8)</sup>  | 3.497    |
| H(4)  | C(17) <sup>8)</sup>  | 3.286    | H(4)  | H(3) <sup>8)</sup>   | 2.603    |
| H(4)  | H(9) <sup>1)</sup>   | 3.139    | H(4)  | H(14) <sup>8)</sup>  | 2.597    |
| H(4)  | H(15) <sup>8)</sup>  | 3.128    | H(4)  | H(21) <sup>8)</sup>  | 2.989    |
| H(4)  | H(23) <sup>10)</sup> | 3.101    | H(5)  | C(21) <sup>10)</sup> | 3.260    |
| H(5)  | C(24) <sup>10)</sup> | 3.542    | H(5)  | C(29) <sup>10)</sup> | 3.463    |
| H(5)  | H(1) <sup>10)</sup>  | 3.319    | H(5)  | H(22) <sup>8)</sup>  | 3.408    |
| H(5)  | H(23) <sup>10)</sup> | 2.565    | H(5)  | H(28) <sup>11)</sup> | 3.222    |
| H(5)  | H(31) <sup>10)</sup> | 3.579    | H(6)  | O(8) <sup>3)</sup>   | 3.519    |
| H(6)  | O(16) <sup>3)</sup>  | 2.652    | H(6)  | C(18) <sup>3)</sup>  | 3.186    |
| H(6)  | C(26) <sup>3)</sup>  | 3.329    | H(6)  | H(11) <sup>7)</sup>  | 3.126    |
| H(6)  | H(18) <sup>6)</sup>  | 3.552    | H(6)  | H(19) <sup>3)</sup>  | 2.594    |
| H(6)  | H(32) <sup>7)</sup>  | 3.449    | H(7)  | C(11) <sup>4)</sup>  | 3.500    |
| H(7)  | C(19) <sup>4)</sup>  | 3.416    | H(7)  | C(31) <sup>12)</sup> | 3.174    |
| H(7)  | H(27) <sup>12)</sup> | 2.438    | H(7)  | H(28) <sup>12)</sup> | 3.429    |
| H(7)  | H(29) <sup>12)</sup> | 3.240    | H(7)  | H(30) <sup>6)</sup>  | 3.213    |
| H(8)  | O(2) <sup>7)</sup>   | 2.625    | H(8)  | C(3) <sup>7)</sup>   | 3.136    |
| H(8)  | C(9) <sup>7)</sup>   | 3.457    | H(8)  | C(22) <sup>7)</sup>  | 3.230    |
| H(8)  | H(11) <sup>7)</sup>  | 3.102    | H(8)  | H(16) <sup>7)</sup>  | 2.471    |
| H(8)  | H(18) <sup>6)</sup>  | 3.279    | H(8)  | H(19) <sup>3)</sup>  | 2.941    |
| H(8)  | H(32) <sup>7)</sup>  | 3.029    | H(8)  | H(33) <sup>7)</sup>  | 2.811    |
| H(9)  | C(17) <sup>6)</sup>  | 3.341    | H(9)  | C(19) <sup>7)</sup>  | 3.516    |
| H(9)  | H(1) <sup>12)</sup>  | 3.122    | H(9)  | H(4) <sup>7)</sup>   | 3.139    |
| H(9)  | H(14) <sup>6)</sup>  | 3.502    | H(9)  | H(15) <sup>6)</sup>  | 2.550    |
| H(9)  | H(16) <sup>7)</sup>  | 2.962    | H(9)  | H(27) <sup>12)</sup> | 3.185    |
| H(9)  | H(30) <sup>6)</sup>  | 3.560    | H(10) | H(26) <sup>7)</sup>  | 3.228    |
| H(10) | H(30) <sup>7)</sup>  | 2.824    | H(11) | C(26) <sup>2)</sup>  | 3.317    |
| H(11) | H(6) <sup>1)</sup>   | 3.126    | H(11) | H(8) <sup>1)</sup>   | 3.102    |
| H(11) | H(18) <sup>2)</sup>  | 3.219    | H(11) | H(19) <sup>2)</sup>  | 2.636    |
| H(12) | C(30) <sup>7)</sup>  | 3.183    | H(12) | H(24) <sup>2)</sup>  | 2.948    |
| H(12) | H(24) <sup>7)</sup>  | 2.814    | H(12) | H(25) <sup>7)</sup>  | 3.308    |

Table 10. Distances beyond the asymmetric unit out to 3.60 Å involving hydrogens (continued)

| atom  | atom                 | distance | atom  | atom                 | distance |
|-------|----------------------|----------|-------|----------------------|----------|
| H(12) | H(26) <sup>7)</sup>  | 2.921    | H(13) | O(16) <sup>3)</sup>  | 2.879    |
| H(13) | H(2) <sup>3)</sup>   | 3.215    | H(14) | C(19) <sup>4)</sup>  | 3.528    |
| H(14) | H(4) <sup>4)</sup>   | 2.597    | H(14) | H(9) <sup>9)</sup>   | 3.502    |
| H(15) | C(28) <sup>9)</sup>  | 3.110    | H(15) | H(4) <sup>4)</sup>   | 3.128    |
| H(15) | H(9) <sup>9)</sup>   | 2.550    | H(15) | H(16) <sup>4)</sup>  | 3.193    |
| H(16) | O(16) <sup>8)</sup>  | 3.148    | H(16) | C(4) <sup>8)</sup>   | 3.594    |
| H(16) | C(18) <sup>8)</sup>  | 3.279    | H(16) | C(27) <sup>1)</sup>  | 3.193    |
| H(16) | C(28) <sup>1)</sup>  | 3.428    | H(16) | H(3) <sup>8)</sup>   | 3.502    |
| H(16) | H(8) <sup>1)</sup>   | 2.471    | H(16) | H(9) <sup>1)</sup>   | 2.962    |
| H(16) | H(15) <sup>8)</sup>  | 3.193    | H(17) | O(16) <sup>8)</sup>  | 3.347    |
| H(17) | C(4) <sup>8)</sup>   | 3.462    | H(17) | C(13) <sup>8)</sup>  | 3.146    |
| H(17) | C(14) <sup>8)</sup>  | 2.962    | H(17) | C(18) <sup>8)</sup>  | 3.578    |
| H(17) | C(25) <sup>8)</sup>  | 3.599    | H(17) | C(30) <sup>7)</sup>  | 3.471    |
| H(17) | H(2) <sup>8)</sup>   | 2.854    | H(17) | H(3) <sup>8)</sup>   | 2.469    |
| H(17) | H(25) <sup>7)</sup>  | 3.121    | H(17) | H(26) <sup>7)</sup>  | 3.097    |
| H(18) | O(8) <sup>5)</sup>   | 3.264    | H(18) | C(18) <sup>5)</sup>  | 3.599    |
| H(18) | C(23) <sup>9)</sup>  | 3.397    | H(18) | C(27) <sup>9)</sup>  | 3.229    |
| H(18) | H(6) <sup>9)</sup>   | 3.552    | H(18) | H(8) <sup>9)</sup>   | 3.279    |
| H(18) | H(11) <sup>5)</sup>  | 3.219    | H(18) | H(19) <sup>5)</sup>  | 3.508    |
| H(19) | O(2) <sup>5)</sup>   | 2.802    | H(19) | C(7) <sup>5)</sup>   | 3.387    |
| H(19) | C(23) <sup>3)</sup>  | 3.267    | H(19) | C(27) <sup>3)</sup>  | 3.439    |
| H(19) | H(6) <sup>3)</sup>   | 2.594    | H(19) | H(8) <sup>3)</sup>   | 2.941    |
| H(19) | H(11) <sup>5)</sup>  | 2.636    | H(19) | H(18) <sup>2)</sup>  | 3.508    |
| H(20) | H(30) <sup>7)</sup>  | 3.528    | H(20) | H(32) <sup>7)</sup>  | 3.565    |
| H(21) | H(4) <sup>4)</sup>   | 2.989    | H(22) | H(5) <sup>4)</sup>   | 3.408    |
| H(22) | H(29) <sup>12)</sup> | 3.013    | H(22) | H(31) <sup>13)</sup> | 2.659    |
| H(23) | C(19) <sup>10)</sup> | 3.505    | H(23) | C(24) <sup>10)</sup> | 3.240    |
| H(23) | H(4) <sup>10)</sup>  | 3.101    | H(23) | H(5) <sup>10)</sup>  | 2.565    |
| H(23) | H(31) <sup>13)</sup> | 3.510    | H(24) | O(2) <sup>5)</sup>   | 2.812    |
| H(24) | O(16) <sup>2)</sup>  | 3.258    | H(24) | C(9) <sup>5)</sup>   | 3.318    |
| H(24) | H(12) <sup>5)</sup>  | 2.948    | H(24) | H(12) <sup>1)</sup>  | 2.814    |
| H(25) | O(2) <sup>5)</sup>   | 3.296    | H(25) | C(5) <sup>9)</sup>   | 3.404    |
| H(25) | C(13) <sup>9)</sup>  | 3.509    | H(25) | C(14) <sup>9)</sup>  | 3.584    |
| H(25) | C(23) <sup>9)</sup>  | 3.575    | H(25) | H(2) <sup>9)</sup>   | 2.689    |
| H(25) | H(12) <sup>1)</sup>  | 3.308    | H(25) | H(17) <sup>1)</sup>  | 3.121    |
| H(26) | C(9) <sup>1)</sup>   | 3.523    | H(26) | C(25) <sup>9)</sup>  | 3.490    |
| H(26) | H(10) <sup>1)</sup>  | 3.228    | H(26) | H(12) <sup>1)</sup>  | 2.921    |

Table 10. Distances beyond the asymmetric unit out to 3.60 Å involving hydrogens (continued)

| atom  | atom                 | distance | atom  | atom                 | distance |
|-------|----------------------|----------|-------|----------------------|----------|
| H(26) | H(17) <sup>1)</sup>  | 3.097    | H(27) | C(25) <sup>11)</sup> | 3.157    |
| H(27) | C(28) <sup>11)</sup> | 3.529    | H(27) | H(7) <sup>11)</sup>  | 2.438    |
| H(27) | H(9) <sup>11)</sup>  | 3.185    | H(27) | H(29) <sup>12)</sup> | 3.531    |
| H(27) | H(31) <sup>13)</sup> | 3.233    | H(28) | C(21) <sup>12)</sup> | 3.087    |
| H(28) | C(24) <sup>12)</sup> | 3.323    | H(28) | H(1) <sup>12)</sup>  | 2.795    |
| H(28) | H(5) <sup>12)</sup>  | 3.222    | H(28) | H(7) <sup>11)</sup>  | 3.429    |
| H(28) | H(29) <sup>12)</sup> | 3.139    | H(28) | H(31) <sup>7)</sup>  | 3.395    |
| H(28) | H(32) <sup>7)</sup>  | 3.362    | H(29) | C(32) <sup>7)</sup>  | 3.252    |
| H(29) | H(7) <sup>11)</sup>  | 3.240    | H(29) | H(22) <sup>11)</sup> | 3.013    |
| H(29) | H(27) <sup>11)</sup> | 3.531    | H(29) | H(28) <sup>11)</sup> | 3.139    |
| H(29) | H(30) <sup>7)</sup>  | 3.271    | H(29) | H(31) <sup>7)</sup>  | 2.691    |
| H(29) | H(32) <sup>7)</sup>  | 3.292    | H(30) | H(7) <sup>9)</sup>   | 3.213    |
| H(30) | H(9) <sup>9)</sup>   | 3.560    | H(30) | H(10) <sup>1)</sup>  | 2.824    |
| H(30) | H(20) <sup>1)</sup>  | 3.528    | H(30) | H(29) <sup>1)</sup>  | 3.271    |
| H(31) | C(29) <sup>13)</sup> | 3.482    | H(31) | C(31) <sup>1)</sup>  | 3.424    |
| H(31) | H(5) <sup>10)</sup>  | 3.579    | H(31) | H(22) <sup>13)</sup> | 2.659    |
| H(31) | H(23) <sup>13)</sup> | 3.510    | H(31) | H(27) <sup>13)</sup> | 3.233    |
| H(31) | H(28) <sup>1)</sup>  | 3.395    | H(31) | H(29) <sup>1)</sup>  | 2.691    |
| H(32) | C(23) <sup>1)</sup>  | 3.418    | H(32) | C(27) <sup>1)</sup>  | 3.178    |
| H(32) | H(6) <sup>1)</sup>   | 3.449    | H(32) | H(8) <sup>1)</sup>   | 3.029    |
| H(32) | H(20) <sup>1)</sup>  | 3.565    | H(32) | H(28) <sup>1)</sup>  | 3.362    |
| H(32) | H(29) <sup>1)</sup>  | 3.292    | H(33) | C(27) <sup>1)</sup>  | 3.533    |
| H(33) | H(8) <sup>1)</sup>   | 2.811    |       |                      |          |

Symmetry Operators:

- |                          |                            |
|--------------------------|----------------------------|
| (1) X,-Y+1/2,Z+1/2-1     | (2) -X,Y+1/2,-Z+1/2        |
| (3) -X,-Y,-Z+1           | (4) X,Y-1,Z                |
| (5) -X,Y+1/2-1,-Z+1/2    | (6) X,-Y+1/2-1,Z+1/2       |
| (7) X,-Y+1/2,Z+1/2       | (8) X,Y+1,Z                |
| (9) X,-Y+1/2-1,Z+1/2-1   | (10) -X+1,-Y+1,-Z+1        |
| (11) -X+1,Y+1/2,-Z+1/2+1 | (12) -X+1,Y+1/2-1,-Z+1/2+1 |
| (13) -X+1,-Y,-Z+1        |                            |
